# Supplementary material
Source: PubMed Central journal article supplement (PMC8750919)
Supplement: NIHMS1767261-supplement-Supplementary_Materials.pdf [file NIHMS1767261-supplement-Supplementary_Materials.pdf]

## MATERIALS AND METHODS

### Experimental Models and Mice

*Chat*-IRES-Cre (*Chat*<sup>tm2<sup>(cre)</sup>Low1</sup>), ROSA-tdTomato (B6.Cg-Gt(ROSA)26Sor<sup>tm9(CAG-tdTomato)Hze/J</sup>) and C57BL/6N-Cysltr1tm1<sup>Ykn/J</sup> mice were purchased from Jackson Laboratories (Bar Harbor, ME). C57BL/6 mice bred in-house (originally from Charles River Laboratories, Wilmington, MA). *Ltc4s*<sup>-/-</sup> mice were generated on a 129Sv background and backcrossed for 15 generations onto the C57BL/6 background (76). CysLT<sub>2</sub>- (*Cysltr2*<sup>-/-</sup>) and CysLT<sub>3</sub>-receptor gene-knockout mice (*Oxgr1*<sup>-/-</sup> or *Cysltr3*<sup>-/-</sup>) were generated on a C57BL/6 background as previously described (51, 77). *Pou2f3*<sup>-/-</sup> mice were generated as described previously (78). *Ltc4s*<sup>fl/fl</sup> mice were provided by Dr. J. Boyce and generated by Ingenious targeting laboratory (Ronkonkoma, NY). B6. *Ltc4s*<sup>fl/fl</sup> mice with loxP sites flanking the 1st exon of *Ltc4s* were generated by homologous gene targeting in C57BL/6 embryonic stem cells. Targeted iTL BF1 (C57BL/6 FLP) embryonic stem cells were microinjected into Balb/c blastocysts. Resulting chimeras with a high percentage black coat color were mated to C57BL/6 WT mice to generate Germline Neo Deleted mice. Homozygous *Ltc4s*<sup>fl/fl</sup> mice were then crossed with *Chat*<sup>Cre</sup> mice to generate double heterozygous mice (*Chat*<sup>Cre+</sup>*Ltc4s*<sup>fl</sup>), which were further mated with *Ltc4s*<sup>fl/fl</sup> mice to generate two genotypes of mice: *Ltc4s*<sup>fl/fl</sup> and *Chat*<sup>Cre+</sup>*Ltc4s*<sup>fl/fl</sup> and used as littermate controls of each other. *Chat*<sup>Cre+</sup>*Ltc4s*<sup>fl/fl</sup> were also mated to ROSA<sup>tm9tdTomato</sup> mice to generate *Chat*<sup>Cre+</sup>-tdTomato<sup>+</sup>- and *Chat*<sup>Cre+</sup>-tdTomato<sup>+</sup>-*Ltc4s*<sup>fl/fl</sup> mice.

All animals were maintained in a specific pathogen-free facility at the Brigham and Women's Hospital; litters were weaned between 19-28 days old. All experiments were performed during the day. Pooled results include both male and female mice.

### Aeroallergen, cytokine and lipid mediator challenge protocols

Mice were anesthetized with an intraperitoneal injection of ketamine (10 mg/kg) and xylazine (20 mg/kg) for full sedation and received a single intranasal (i.n.) application of pharmacologic agonists or allergen dissolved in 20 µl PBS. IL-25 for intranasal challenges was dissolved in 4 nM hydrochloric acid and diluted with PBS to a final concentration of 100-500 ng/20 µl. LTC<sub>4</sub> was stored in ethanol; the ethanol was evaporated and LTC<sub>4</sub> was reconstituted in PBS for immediate application

For allergen challenge experiments, mice were given a single intranasal inhalation of 30 µg of *Alternaria alternata* (Greer) culture filtrate in 20 µl of PBS. Mice were euthanized with ketamine overdose at 1 hour for nasal lavage, at 24 hours for BAL or mediastinal lymph node digestion and at 72 hours for lung and tracheal harvesting (Fig. 5A, 6A).

For low-dose IL-25 and LTC<sub>4</sub> + IL-25 synergy experiments, mice were given three daily intranasal inhalations of 1.6 nmol of LTC<sub>4</sub>, or 100 ng IL-25, or combination of 100 ng IL-25 and 1.6 nmol of LTC<sub>4</sub> in 20

$\mu$ l of PBS (**Fig. 1A**). To determine if other lipid mediators cooperate with IL-25, mice were given either 2 nmol LTD<sub>4</sub> or 2.3 nmol LTE<sub>4</sub>, or a combination of indicated doses of LTD<sub>4</sub> or LTE<sub>4</sub> with 100 ng IL-25.

In another set of experiments, mice were given 100, 200 or 500 ng IL-25 intranasally (**Fig. S1A**). Tissues were harvested 48 hours after the last intranasal administration.

For IL-13-induced tuft cell proliferation in the trachea, mice were given a single 5  $\mu$ g of mouse IL-13 (Biolegend) in 100  $\mu$ l of PBS intraperitoneally and the trachea was harvested on day 5 after the cytokine injection (**Fig. S2H, I**).

BAL for assessment of inflammation was collected by repetitive (n=3) instillation of 0.75 ml of PBS with 1 mM EDTA and aspiration of the fluid from the lungs through a tracheal opening. The BAL fluid was centrifuged at 500g for 5 min and the supernatant was discarded. Cell pellets were resuspended in 0.2 ml of PBS, and the total cells were counted manually under a microscope with a hemocytometer. For the differential cell counts of macrophages, neutrophils, and eosinophils, the BAL cells were cytopspun onto fresh labeled glass slides at 500 rpm for 5 min. Air-dried slides were then stained using Diff-Quik stain kit. Cell types in a total of 400 cells were identified by morphologic criteria (34) and differential cell counts were performed under microscope (**Fig. 6B, Fig. S9A**).

For nasal lavage, mice were euthanized 1 hour after the intranasal challenge, and the nose was lavaged through a small incision in the trachea using 300  $\mu$ l of PBS. The nasal lavage fluid proteins were precipitated with ice cold acetone and after high-speed centrifugation, the supernatant was used for CysLT and PGD<sub>2</sub> measurements (**Fig. 3G**).

### Single cell preparations for evaluation of inflammation

For evaluation of lung inflammation, lungs were flushed with 10 ml of cold HBSS until they appeared white in color. The right lobe was removed, physically dissociated with a gentle MACS Dissociator in 10 ml of RPMI 1640 containing 10% FBS, followed by digestion with collagenase IV (500 U/ml), dispase (6.6 U/ml) and DNase I (20  $\mu$ g/ml) in RPMI 1640 with 5% FCS at 37°C for 30 min with agitation at 200 rpm. The digestion was terminated by adding 10 ml of cold RPMI 1640 with 10% FBS. Cell suspensions were washed with FACS buffer and prepared for analysis by FACS.

To identify lung ILC2s among CD45<sup>+</sup> cells, lineage-positive cells were excluded using monoclonal antibodies against CD19, CD8, GR1, Fc $\epsilon$ r1, NK1.1, CD11c, CD11b, TCR $\beta$ , TCR $\gamma\delta$ , TER119 and CD4. ILC2 cells were identified as lin<sup>-</sup> Thy1.2<sup>+</sup> cells with low forward and side scatter (**Fig. S1D**). Lung DCs were defined as CD45<sup>+</sup> SiglecF<sup>-</sup>CD11c<sup>+</sup>MHCII<sup>+</sup> cells and further differentiated based on their expression of CD301b and CD11b (6). Macrophages were identified as CD45<sup>+</sup> SiglecF<sup>+</sup>CD11b<sup>-</sup>CD11c<sup>+</sup> cells, and eosinophils as CD45<sup>+</sup> SiglecF<sup>+</sup>CD11b<sup>+</sup>CD11c<sup>-</sup>SSC<sup>high</sup> after excluding B220 cells (13). Neutrophils were identified as CD11b<sup>+</sup>FSC<sup>low</sup>SSC<sup>interm</sup> cells after excluding for B220, CD8, Siglec F, CD11c, MHCII.

Ki-67 staining of the single-cell lung suspension was performed using True-Nuclear™ Transcription Factor Buffer Set (Biolegend). Surface staining of the single cells was followed by fixation with 1.4 ml of fixative from the indicated set for 1 hour, and further permeabilization with the buffer from the same set according to manufacturer's protocol. The samples were then stained with intracellular rat anti-Ki67 antibody (Invitrogen, clone SolA15) or isotype for 45-50 minutes (**Fig. 1F, G, S1D, F, G**).

For intracellular cytokine staining experiments, single-cell suspensions from the whole left lung were incubated at 37°C for 4 h in R10 media (RPMI medium 1640 containing 10% (vol/vol) FBS, 2 mM L-glutamine, 0.1 mM nonessential amino acids, penicillin (100 units/ml), streptomycin (100 µg/ml)), supplemented with 1 µl/ml of Golgi-Plug Protein Transport Inhibitor (BD Biosciences), followed by 15 min incubation with 50 µg/ml DNase I. The harvested cells were then spun at 500 × g for 10 min at 4°C and stained for extracellular markers. The samples were further washed with FACS buffer and fixed for 20 min at room temperature. The cell suspensions were permeabilized using Intracellular Staining Permeabilization Wash Buffer (Biolegend) and stained with either a mixture of PE-conjugated cytokines IL-4, IL-5, IL-13 or a PE-conjugated IgG1 isotype for 30 min (**Fig. 1H, I, S2A, B**).

To isolate immune cells from lymph nodes, the lung draining mediastinal lymph nodes were harvested and digested in PBS solution containing collagenase IV (100 U/ml) and DNase I (20 µg/ml) for 30 mins at 37 °C. The cell suspension was stained with antibodies against CD4, CD8, B220, MHCII, CD11c, CD11b for FACS. T cells were identified as CD8<sup>+</sup> and CD4<sup>+</sup> and B cells were distinguished based on their expression of B220 while DCs were identified based on MHCII and CD11c expression (**Fig. 6C, E, S9B, C**).

### **Cytokine detection in the whole lung**

For protein extraction, the frozen lobes of the right lungs were mechanically homogenized in 300 µl of T-PER protein extraction buffer supplemented with appropriate amount of protease inhibitor cocktail (cOmplete™, Mini Protease Inhibitor Cocktail, Sigma Aldrich; 10 ml T-Per buffer/1 tablet). The suspensions were spun, and the supernatants were collected. The protein concentration was measured with commercially available bicinchonic acid (BCA) protein assay kit (Thermo Fisher Scientific) according to manufacturer's instructions.

The cytokine concentrations were measured with LEGENDplex T-helper Cytokine Panel (Biolegend) in V-bottom plates, following the manufacturer's instructions. In brief, supernatants were incubated for 2 hours with fluorescence-encoded beads, differentiated by size and internal fluorescence intensities to detect 12 cytokines. The cytokine panel included IFN-γ, IL-5, TNF-α, IL-2, IL-6, IL-4, IL-10, IL-9, IL-17A, IL-17F, IL-22, IL-13. After washing, a biotinylated detection antibody cocktail was added, followed by incubation with streptavidin-phycoerythrin. Fluorescent signal intensities were then measured on 5-Laser BD FACSAria Fusion (**Fig. 2G, S2C-E**).

### Single cell preparations for *ex vivo* stimulation and RNA sequencing

For single-cell preparations of the nasal mucosa, mice were euthanized and the snout was isolated and the nasal mucosa was exposed after the nasal bone was removed (73). The snout was incubated in pre-warmed PBS solution with dispase (16 U/ml) and deoxyribonuclease I (DNase I; 20 µg/ml) for 30 to 40 min at room temperature on a rotating shaker at 220 rpm. Dispase activity was reduced with Dulbecco's modified Eagle's medium (DMEM) and 5% fetal bovine serum (FBS) and the nasal mucosa was separated mechanically. The separated nasal mucosa was incubated in Tyrode's Solution with bicarbonate, HEPES, 0.25% BSA, without Ca<sup>2+</sup>, with added 31 U/ml of papain, 25 mg/ml L-cysteine and 20 µg/ml DNase I for 40 min at 37 °C on a rotating shaker. Papain digestion was terminated with Tyrode's Solution with HEPES and Ca<sup>2+</sup> and with 2 µl/ml leupeptin (5 mg/ml). The digested tissue was vortexed for 20-30 sec, triturated thoroughly with an 18-gauge needle followed by a 21-gauge needle, passed through a 100 µm filter, and washed with FACS buffer (based on Hank's Balanced Salt Solution (HBSS) without Ca<sup>2+</sup>, with added 2% FBS and 2 mM EDTA) (15, 73).

The resultant nasal single cell suspensions were first incubated with CD16/32 to inhibit non-specific binding for at least 30 min. The nasal epithelial cells were stained using monoclonal antibodies against CD45 and EpCAM for 40 min, followed by dead cell exclusion with propidium iodide before FACS sorting. All samples were FSC-A/SSC-A gated to exclude debris, SSC-H/SSC-W and FSC-H/SSC-W gated to select single cells.

Epithelial cells from *Chat<sup>Cre</sup>tdTomato* and *Chat<sup>Cre</sup>tdTomatoLtc4s<sup>fl/fl</sup>* mice were collected based on the low/negative expression of CD45 and EpCAM expression. Tuft cells were defined as EpCAM<sup>high</sup>Tomato<sup>+</sup> and epithelial cells as EpCAM<sup>high</sup>Tomato<sup>-</sup> (**Fig. S4B**). Epithelial cells from *Ltc4s<sup>fl/fl</sup>* and *Chat<sup>Cre</sup>Ltc4s<sup>fl/fl</sup>* mice were collected based on their expression of CD45 and three populations of cells were submitted for RNAseq: EpCAM<sup>high</sup>CD45<sup>low</sup>FSC<sup>low</sup>SSC<sup>low</sup>, EpCAM<sup>high</sup>CD45<sup>neg</sup>FSC<sup>low</sup>SSC<sup>low</sup>, and EpCAM<sup>int</sup>CD45<sup>neg</sup>SSC<sup>low</sup> epithelial cells (**Fig. S4D**). Cells were sorted into DMEM-based epithelial cell proliferation media for *ex vivo* stimulation or TCL buffer (Qiagen) supplemented with 1% 2-mercaptoethanol for RNA sequencing.

To isolate nasal hematopoietic cells for RNAseq, the freshly isolated nasal mucosa was enzymatically dissociated with a PBS-based solution containing collagenase IV (650 U/ml), dispase (16 U/ml), and DNase I for 30 mins at 37°C on a rotating shaker. The digestion was terminated by addition of 1 ml of cold DMEM with 5% FBS. For RNA sequencing, DCs were defined as CD45<sup>+</sup>CD11b<sup>+</sup>SiglecF<sup>-</sup>CD11c<sup>+</sup>MHCII<sup>+</sup> cells, and macrophages were identified as CD45<sup>+</sup>CD11b<sup>+</sup>SiglecF<sup>+</sup>CD11c<sup>+</sup> cells after excluding CD19<sup>+</sup> and TCRβ<sup>+</sup> cells. (**Fig. S5B**). Cell were sorted into 10 µl of TCL buffer +1% BME for RNA sequencing.

All FACS sorting was performed at the Brigham and Women's Center for Cellular Profiling using a 4-Laser BD FACSAria Fusion Cell Sorter.

### *Ex vivo* stimulation of tuft cells, macrophages, and eosinophils

For *ex vivo* assays, EpCAM<sup>high</sup>CD45<sup>low</sup>FSC<sup>low</sup>SSC<sup>low</sup> cells from *Chat<sup>Cre</sup>*, *Ltc4s<sup>fl/fl</sup>* and *Chat<sup>Cre</sup>Ltc4s<sup>fl/fl</sup>* mice were sorted into DMEM-based epithelial cell proliferation media, which includes DMEM/F-12, 5% Nu-Serum, 100 µg/ml Penicillin-Streptomycin (Gibco) and 0.25 µg/ml Amphotericin B. The cells were plated into 96-well culture plates at a concentration of 400,000 cells/ml in 200 µL of media per well for tuft cells and 1.2x10<sup>6</sup>-2.3x10<sup>6</sup> cells/ml in 200 µL for CD45<sup>+</sup> cells. The cells were rested overnight and stimulated with 1 mM A23187 or 0.5 mM ATPγS in 50 µl of HBSS with Ca<sup>2+</sup> and Mg<sup>2+</sup> for 30 min. After stimulation, the plate was centrifuged at 350 × g for 5 min at 4 °C, and the supernatants were assessed for eicosanoids.

For *ex vivo* stimulation of nasal hematopoietic cells, the nasal mucosa was processed in parallel with tuft cell isolation with dispase and papain solutions (as described above) and the single cell suspension was stained with antibodies to mark epithelial cells and macrophages. The isolated CD45<sup>+</sup> cells and CD45<sup>+</sup>CD11b<sup>+</sup>SiglecF<sup>+</sup>CD11c<sup>+</sup> CD19<sup>-</sup>TCRβ<sup>-</sup> nasal macrophages were sorted into R10 media (RPMI medium 1640 containing 10% (vol/vol) FBS, 2 mM L-glutamine, 0.1 mM nonessential amino acids, penicillin (100 units/ml), streptomycin (100 µg/ml). For *ex vivo* stimulation, the cells were plated at a concentration of 1.2x10<sup>6</sup>-2.3x10<sup>6</sup> cells/ml for CD45<sup>+</sup> cells, and 66-200 x10<sup>3</sup> cells/ml for nasal macrophages, rested for 1-18 hours and stimulated with 1 mM A23187 for 30 min, and the supernatants were retained to assess eicosanoids.

For *ex vivo* stimulation of lung immune cells, sorted CD45<sup>+</sup> SiglecF<sup>+</sup>CD11b<sup>-</sup> CD11c<sup>+</sup> lung macrophages and CD45<sup>+</sup>SiglecF<sup>+</sup>CD11b<sup>+</sup> CD11c<sup>-</sup>SSC<sup>high</sup> eosinophils were plated in R10 media at a concentration of 0.5 x10<sup>6</sup> cells/ml for macrophages and 0.066-1.3 x10<sup>6</sup> cells/ml for eosinophils. The cells were rested for 1-18 hours and stimulated with 1mM A23187. The supernatants were obtained for eicosanoid detection assays.

### ***In situ* Hybridization (RNAscope) and mRNA quantitation**

Tissue collection was performed under strict RNAase-free conditions. The nose and trachea were fixed with 4% PFA in DEPC-treated PBS for 12 hours. The trachea was then frozen while the nose was decalcified with DEPC-treated 14% EDTA solution for 10 days. Frozen tissue samples were sectioned to a thickness of 16 µm. For RNAscope *in situ* hybridization we used RNAscope® Fluorescent Multiplex Reagent Kit v2 (ACD, cat. No. 323120) assay following the manufacturer's instructions. In brief, both nasal and tracheal sections were post-fixed in 4% PFA for 15 min at room temperature, treated with hydrogen peroxide for 10 min at room temperature and treated with Protease III for 10 min at 40°C before probe incubation. The probe to *Lct4s* was custom-made by ACD (Cat. No. 1092591-C1) and it targets exons 1-5 of the *Lct4s* transcript (nucleotides 98-534 of NM\_008521.2). For immunohistochemistry after *in situ* hybridization, sections were rinsed in PBS after final RNAscope wash and permeabilized and blocked again with 5% NDS/0.5% Triton X-100 Sorenson's buffer to further incubate with a mix of anti-advillin (Novus Biologicals) and anti-neurogranin (Abcam) antibodies in a dilution of 1:100 over night at 4°C. After several washes with PBS, sections were incubated with a Donkey anti rabbit antibody coupled to Alexa Fluor 647 for 2 hours and mounted in DAPI-FluoromountG.

Both WT and *Chat<sup>Cre</sup>Lct4s<sup>fl/fl</sup>* tissues were treated similarly and at the same time. After RNAscope and/or immunostaining, the sections were imaged on a Leica SP8 confocal microscope. The regions in the nose epithelium were chosen based on their expression on Advillin/Neurogranin in tuft cells. On tracheal sections, random regions in the epithelium were chosen. The entire sections were imaged in consecutive z-slices separated by 1  $\mu\text{m}$  using a 63x oil objective. The z stacks were then projected at maximum fluorescence intensity using Fiji/ImageJ. All quantifications were done blind to condition by assigning random numbers to each image. Only after the quantification was done, the identity of the images was revealed to assign the values to their corresponding condition. All the procedures were done under the same technical conditions and all the fluorescence parameters were kept constant between control and experimental conditions.

To quantify expression of transcripts by RNAscope, the images were applied a threshold until only puncta signal was observed. All images were treated the same way using Fiji (ImageJ). Then, the integrated density was measured as a method to quantify total mRNA puncta. In the case of nasal tissue, the signal was measured only in tuft cells, as revealed by the expression of Advillin/Neurogranin, thus the quantification represents mRNA per cell. In the case of the trachea, a random area of the tracheal epithelium, as reflected by DAPI stain, was quantified for mRNA puncta and the values represent mRNA per area of tracheal epithelium.

### **CysLT and PGD<sub>2</sub> detection**

**CysLT and PGD<sub>2</sub> detection by ELISA:** CysLT and PGD<sub>2</sub> generation in the supernatants of tuft cells, CD45<sup>+</sup> sorted cells, and acetone-precipitated nasal lavage fluid were measured by commercially available Cysteinyl Leukotriene ELISA kit (Cayman Chemical, 500390) and Prostaglandin D<sub>2</sub> ELISA kit (Cayman Chemical, 512031) according to the manufacturer's instructions. The assays are based on competition between CysLTs/PGD<sub>2</sub> and CysLT-acetylcholinesterase/PGD<sub>2</sub>-acetylcholinesterase conjugate for a limited amount of CysLT/PGD<sub>2</sub> ELISA Monoclonal Antibody. The lower limit of detection for CysLT ELISA was 60 pg/ml and the following reported reactivity: Leukotriene C<sub>4</sub> (100%), Leukotriene D<sub>4</sub> (100%), Leukotriene E<sub>4</sub> (79%), 5,6-DiHETE (3.7%), Leukotriene B<sub>4</sub> (1.3%), 5(S)-HETE (0.04%), Arachidonic Acid (<0.01%). The lower limit of detection for PGD<sub>2</sub> ELISA was 19.5 pg/ml and the following reported reactivity: Prostaglandin D<sub>2</sub> (100%), Prostaglandin F<sub>2 $\alpha$</sub>  (92.4%), Prostaglandin J<sub>2</sub> (21.6%), Prostaglandin E<sub>2</sub> (2.86%), Thromboxane B<sub>2</sub> (2.54%), 11 $\beta$ -Prostaglandin F<sub>2 $\alpha$</sub>  (1.99%), 8-iso Prostaglandin F<sub>2 $\alpha$</sub>  (1.90%), Prostaglandin A<sub>2</sub> (0.72%), 12(S)-HHTrE (0.16%), 6-keto Prostaglandin F<sub>1 $\alpha$</sub>  (0.05%), (13,14-dihydro-15-keto Prostaglandin D<sub>2</sub>) 0.02%, Arachidonic Acid (<0.01%), Leukotriene D<sub>4</sub> (<0.01%), tetranor-PGDM (<0.01%), tetranor-PGEM (<0.01%), tetranor-PGFM (<0.01%) and tetranor-PGJM (<0.01%).

**Liquid chromatography/mass spectrometry:** Lipid analysis for eicosanoids (LTC<sub>4</sub>, LTD<sub>4</sub>, LTE<sub>4</sub>, 5-HETE, PGD<sub>2</sub>, PGDE<sub>2</sub>, 9-HODE, 13-HODE, 9,10-EpOME and 12, 13-EpOME) was performed at the UCSD Lipidomics Core (<https://www.ucsd-lipidmaps.org/home>) (74, 75).

Targeted analysis for CysLTs was performed at the Harvard Mass Spectrometry Facility. Proteins were precipitated in samples by adding 200ul of methanol (with D4-d5 25nM as internal standard) and incubating at -80 °C for 2 hours. After centrifugation the supernatants were transferred to new microcentrifuge tubes and dried under nitrogen flow. Samples were resuspended in 20 ul of methanol:mobile phase A (see below) 1:1. A standard curve was prepared by an eight-level serial dilution (1/5, starting with a 1/40 dilution of the Cayman mix) for all compounds in methanol. 20ul of each calibration curve point was transferred to microcentrifuge tube and treated following the same protocol as the samples. Samples were analyzed on an ultimate 3000 LC coupled with a Q-exactive plus mass spectrometer (ThermoFisher). Ten microliters of samples were injected on a Kinetex C18 column (2.6u, 150x2.1 mm, Phenomenex), maintained at 30°C. The LC mobile phases were A: 10 mM ammonium Acetate, 0.1% Formic acid in water and B: Methanol, 0.2% formic acid. The gradient was as follow: starting at 20% B for 5 min, to 100% B in 10 min, followed by 10 min at 100%-, and 5-min re-equilibration at 20% B. the flow rate was maintained at 0.15 ml/min. The mass spec was set to positive polarity, with a resolution of 70000 and scanning m/z 200 to 900. Compounds were quantified by integrating the area under the peaks of the compounds (extracted accurate mass at 5ppm, retention time confirmed by the authentic standards) and using the ratio with the IS to calculate the absolute concentration, using the calibration curve.

### **Histochemistry, immunofluorescence and quantitative assessment of goblet cell and tuft cell numbers**

**Assessment of goblet cell numbers.** For histochemical evaluation, the left lung was embedded in glycolmethacrylate. Tissue sections, 2.5 µm thick, were assessed by PAS for quantitation of mucin-containing goblet cells and by Congo red reactivity for quantitation of eosinophil recruitment. Slides were counterstained with hematoxylin for general morphologic examination. All histologic assessments were done in a blinded fashion by a single investigator. The number of PAS-reactive cells for each animal was enumerated from 3-6 10-20x digital photographs spanning 2-13 mm basement membrane over the 4 coronal sections. This area was divided by the length of basement membrane to define the average thickness of the submucosal space.

**Confocal microscopy of whole tracheal mounts.** The harvested tracheas were fixed with 4% PFA, washed with PBS and permeabilized in a PBS-based blocking buffer containing 0.1% Triton X-100, 0.1% saponin, 3% bovine serum albumin, and 3% normal donkey serum for at least 3 hours. The tracheas were further incubated with primary rabbit anti-DCLK1 antibody added to the permeabilizing solution at 4°C for 48 to 72 hours. The samples were then washed with PBS containing 0.1% Triton X-100 for 3 hours and transferred to PBS containing donkey anti-rabbit secondary antibody, Alexa Fluor Plus 594 and Hoechst 33342 for nuclear stain. Tracheas were longitudinally split into two halves and embedded with the epithelial surface facing upward using a glycerol-based cover slipping solution. Images were acquired at the Brigham and Women's Hospital Confocal Microscopy Core Facility using the Zeiss LSM 800 with Airyscan confocal system on a Zeiss Axio Observer Z1 inverted microscope with 10× Zeiss [0.30 numerical aperture (NA)], 20× Zeiss (0.8 NA), and a

63× Zeiss oil (1.4 NA) objectives.

**Histological quantification of tuft and goblet cells.** The number of tuft cells for each trachea was enumerated from 6 to 8 photographs corresponding to 0.6-1 mm<sup>2</sup> taken from the same areas of each trachea starting at the distal end in proximity to the carina. The total number of DCLK1 immunoreactive cells (ranging from 131 to 205 tuft cells in unchallenged mice to 144 to 296 tuft cells in challenged mice) was divided by the area captured in the focal plane to define the number of DCLK1<sup>+</sup> cells per square millimeter. DCLK1 immunoreactive cells and focal plane area were evaluated using ImageJ (National Institutes of Health, Bethesda, MD). Separate images were collected for each fluorochrome and overlaid to obtain a multicolor image.

To quantitate goblet cells, the number of PAS-reactive cells for each animal was enumerated from 3-6 10-20x digital photographs spanning 2-13 mm basement membrane over the 4 coronal sections. This area was divided by the length of basement membrane to define the average thickness of the submucosal space.

### **Low input RNA sequencing.**

**Preprocessing:** Paired-end reads were mapped to the UCSC mm10 mouse transcriptome using Bowtie57 with parameters ‘-q-phred33-quals -n 1 -e 99999999 -l 25 -I 1 -X 2000 -a -m 15 -S -p 6’, which allows alignment of sequences with one mismatch. For each sample, we determined the number of genes for which at least one read was mapped, and then excluded all samples with fewer than 10,000 detected genes. Only one sample was excluded in this way. Variable genes were selected using logistic regression fit to fraction of samples in which each transcript was detected, using the log of total transcripts for each gene as a predictor. Outliers from this curve are genes that are expressed in a lower fraction of samples than would be expected given the total number of reads mapping to that gene, that is, treatment condition or state-specific genes. We used a threshold of deviance <-0.2, producing a set of 2307 variable genes. We restricted the expression matrix to this subset of variable genes and took the variance stabilizing transformation  $\log_2(\text{TPM} + 1)$  to generate the digital gene expression (DGE) matrix that was used for all downstream analysis. We performed dimensionality reduction on the DGE matrix using PCA. Values were centered and scaled before input to PCA, which was implemented using the R function ‘prcomp’ from the ‘stats’ package. The data were visualized in Fig. 3 using the first two principal components, which accounted for 29% and 10% of the variance respectively.

**Comparison to known tuft cell signature:** Tuft cell marker genes were derived from the ‘consensus’ signature defined with single-cell RNA sequencing (9). Heatmaps were generated using the ‘pheatmap’ R package.

**Correlation of nasal epithelial groups:** Pairwise Pearson correlations between all samples were calculated using the R function ‘cor’ from the ‘stats’ package (**Fig. S3D**). To identify the similarity between the putative prospectively isolated tuft cells (*Ltc4s*<sup>fl/fl</sup> EpCAM<sup>high</sup> CD45<sup>low</sup>), the mean expression of each gene across the *Ltc4s*<sup>fl/fl</sup> EpCAM<sup>high</sup> CD45<sup>low</sup> tuft cell-enriched samples and used this as a reference signature to calculate



Pearson correlations with other samples. We visualized the correlation of each sample to the *Ltc4s*<sup>fl/fl</sup> EpCAM<sup>high</sup> CD45<sup>low</sup> consensus signature, grouped by sample population, and ranked these by their mean correlation.

***Ltc4s* expression in neurons:** Expression data for mouse neuronal populations was downloaded from the Mouse Brain Atlas (<http://mousebrain.org/downloads.html>) and visualized using the 'ggplot2' package in R.

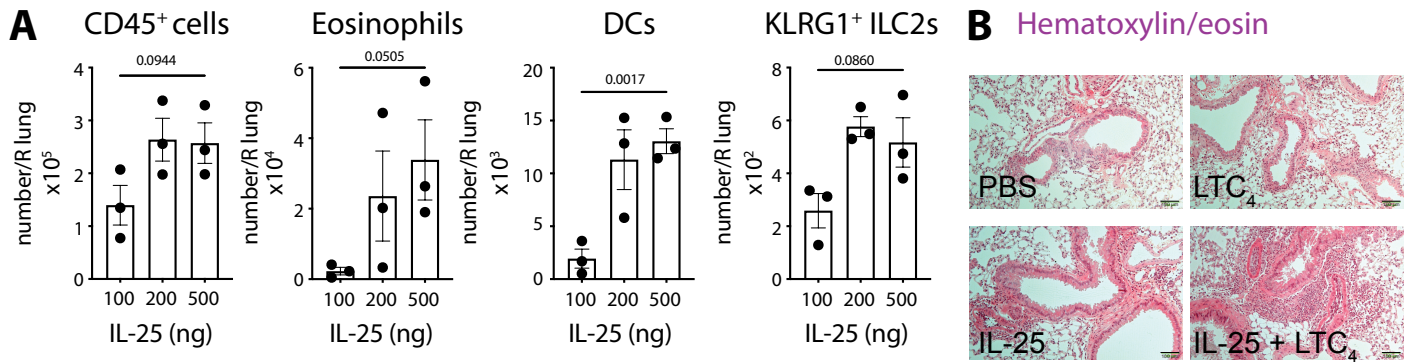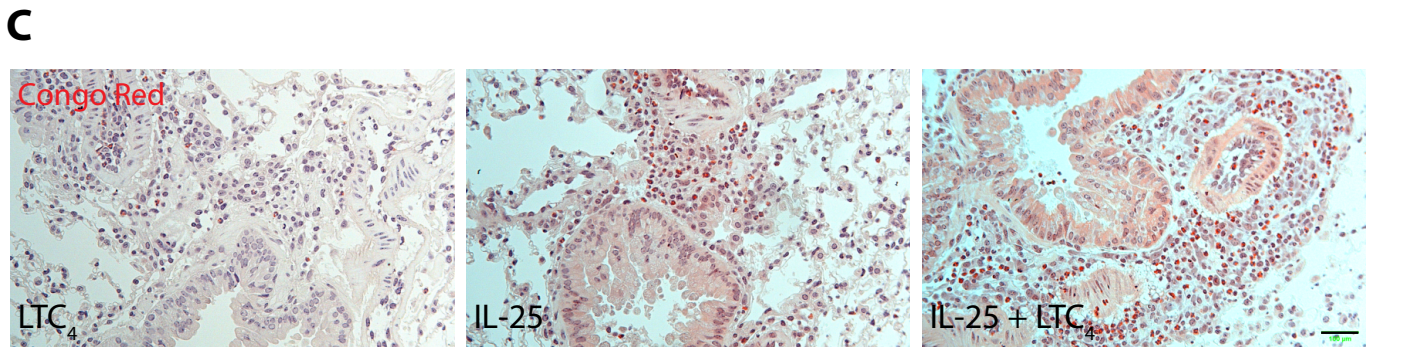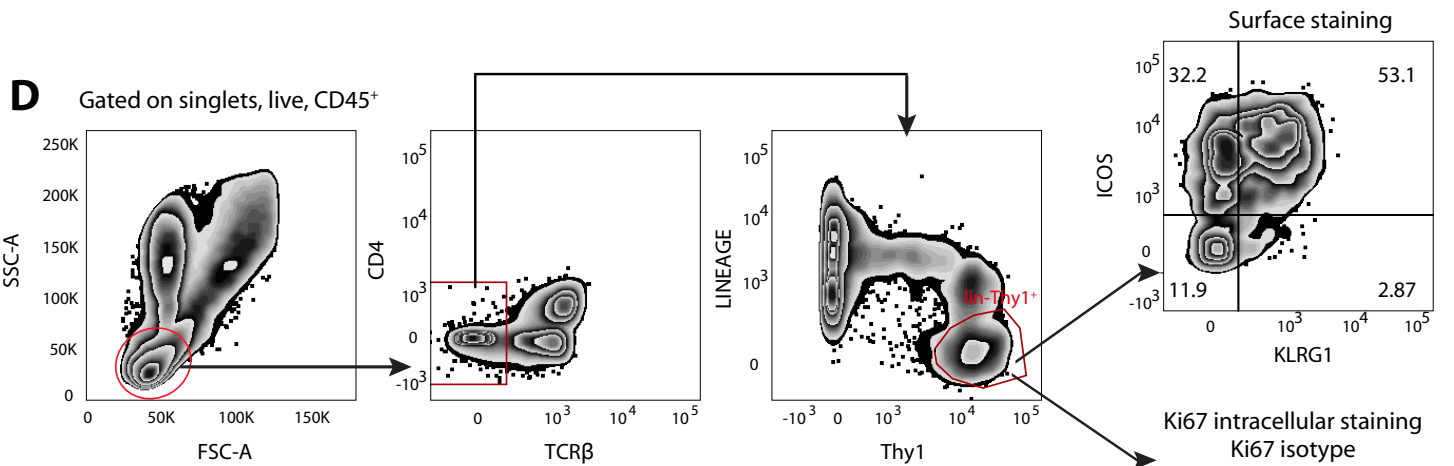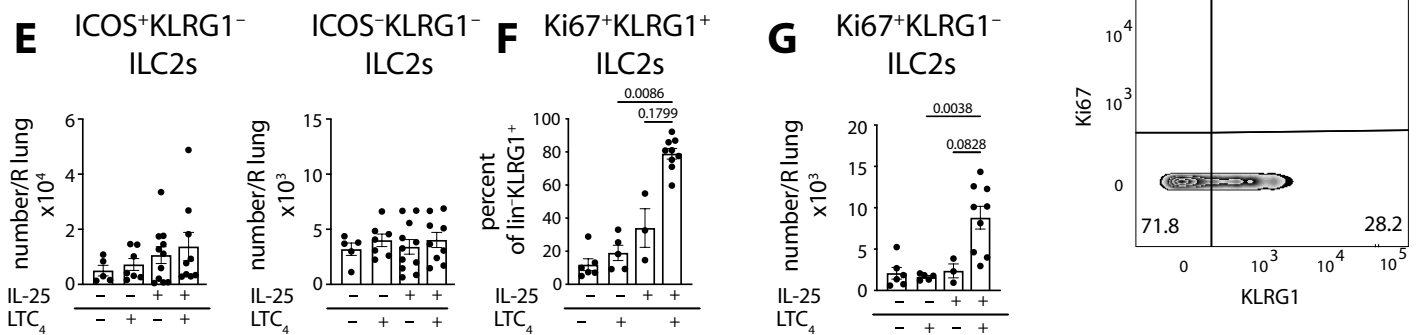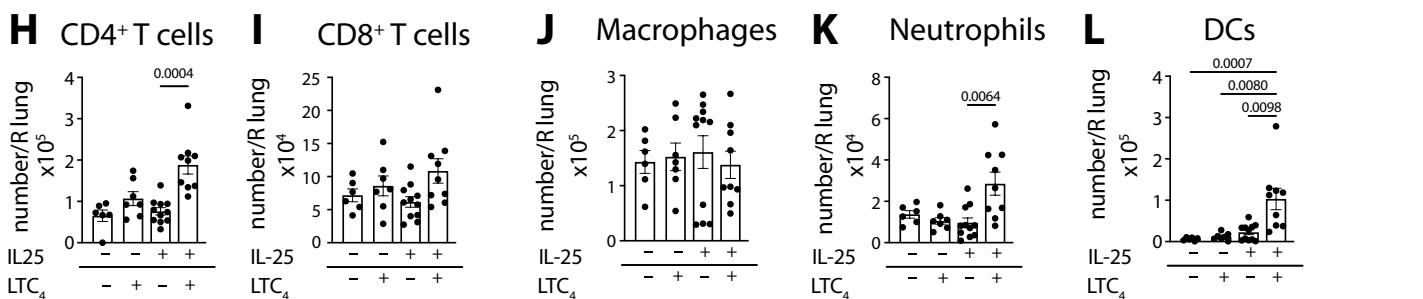

**Fig. S1. LTC<sub>4</sub> and IL-25 synergize for airway type 2 lung inflammation.**

(A) C57BL/6 were given three daily intranasal inhalations of IL-25 at three doses (100, 200, and 500 ng) and lung inflammation was assessed by FACS of the lung 48 hours after the last intranasal IL-25 administration. (B-L) WT mice were given three daily inhalations of LTC<sub>4</sub> (1.6 nmol) or IL-25 (100 ng) or a combination of LTC<sub>4</sub> and IL-25 and assessed 48 hours after the last dose (as in **Fig. 1A**). (B) Lung inflammation was visualized by Hematoxylin and Eosin stain. (C) Eosinophils were visualized with Congo Red stain. Scale bar indicates 100  $\mu$ m. (D) Gating strategy for ILC2s and ILC2 proliferation by Ki67. (E) Counts of ICOS<sup>+</sup>KLRG1<sup>-</sup>ILC2s and ICOS<sup>-</sup>KLRG1<sup>-</sup>ILC2s in the right lung by FACS. (F) Frequency of Ki67<sup>+</sup> cells within the KLRG1<sup>+</sup>ILC2 subset. (G) Number of Ki67<sup>+</sup>KLRG1<sup>-</sup>ILC2s, (H) number of CD4<sup>+</sup> T cells, (I) number of CD8<sup>+</sup> T cells, (J) number of macrophages, (K) number of neutrophils and (L) number DCs in the lung assessed by FACS. Data are means  $\pm$  SEM pooled from 3 independent experiments, each dot is a mouse, p values indicated, Kruskal-Wallis ANOVA with Dunn's correction for multiple comparisons.

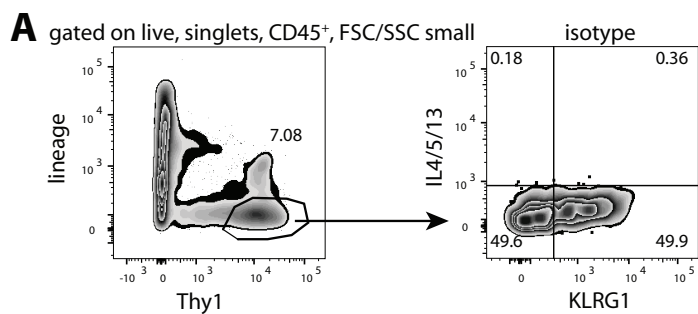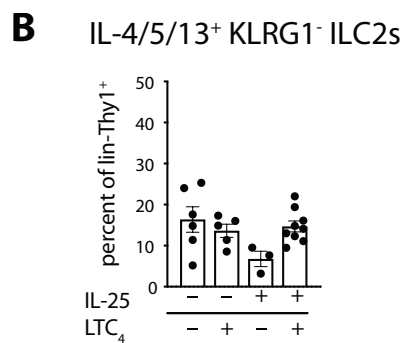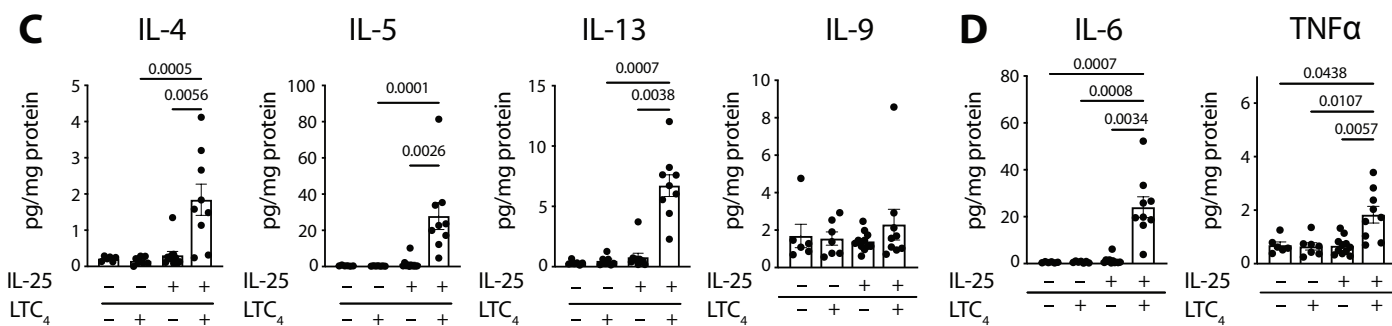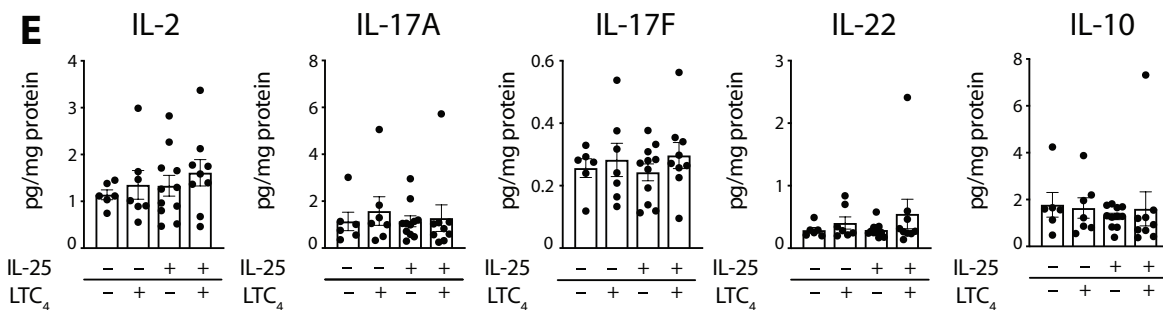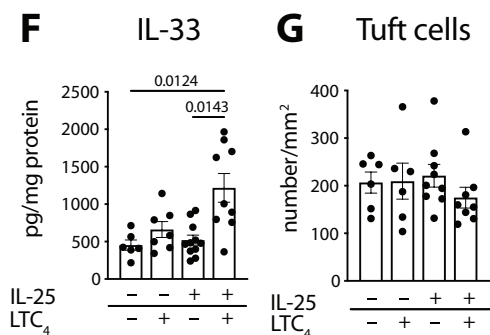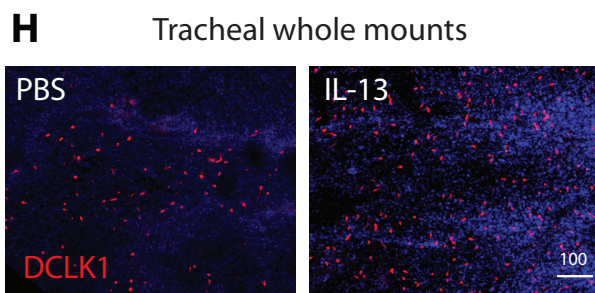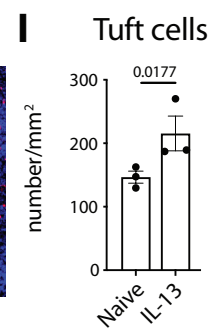

**Fig. S2. Lung cytokine profile and tuft cell numbers after LTC<sub>4</sub> and IL-25 inhalation.**

(A) Gating strategy for ILC2 cytokine production and isotype control for IL-4/5/13. (B) Percent of type 2 cytokine expressing KLRG1<sup>-</sup> cells expressed as percent of Thy1<sup>+</sup> ILC2 cells defined by FACS. (C-E) Cytokine concentration of whole lung homogenates was determined by LegendPlex ELISA and expressed as pg per mg of lung protein. (F) Lung IL-33 was measured in whole lung homogenates by ELISA and expressed as pg per mg protein. Data are means ± SEM pooled from 3 independent experiments, each dot is a separate mouse, p values <0.05 indicated, Kruskal-Wallis ANOVA with Dunn's correction for multiple comparisons. (G-I) Tuft cells (DCLK1<sup>+</sup>) numbers were assessed in whole trachea mounts in mice given inhalations of IL-25 and LTC<sub>4</sub> (G) or intraperitoneal injections of IL-13 (H, I), n=3 experiment for G, n=1 experiment for H, I each dot represents a separate mouse, p value from negative binomial regression. Scale bar in μm.

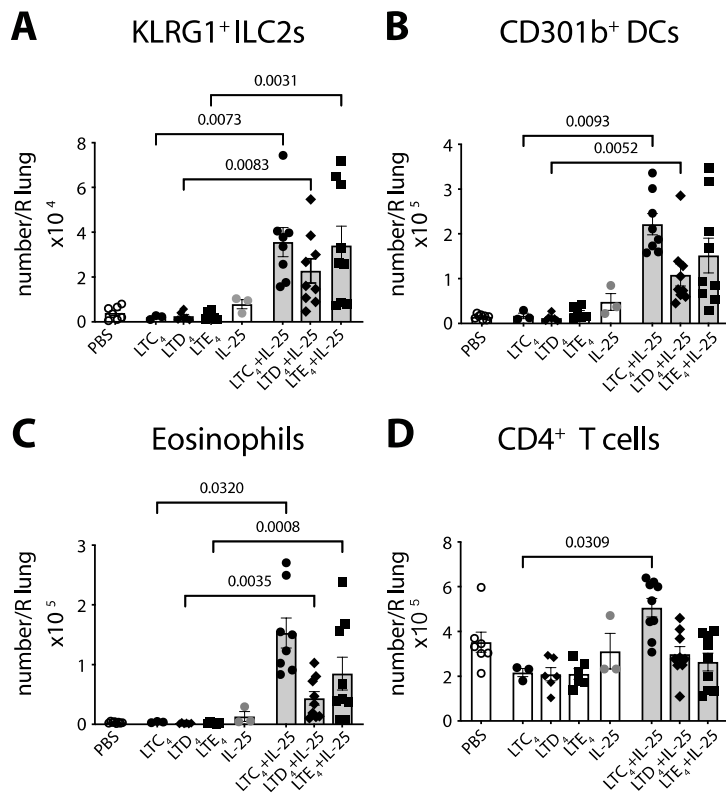

**Fig. S3. CysLT synergy with IL-25 to promote lung inflammation *in vivo* is primarily driven by LTC<sub>4</sub>.** WT mice were given three daily inhalations of LTC<sub>4</sub>, LTD<sub>4</sub> or LTE<sub>4</sub> alone, IL-25 (100 ng) alone or a combination of each CysLT with IL-25 and assessed 48 hours after the last dose. **(A)** Absolute counts of KLRG1<sup>+</sup>ILC2s, **(B)** CD301b<sup>+</sup> DCs, **(C)** eosinophils, and **(D)** CD4<sup>+</sup> T cells in the lung was assessed by FACS. Data are means ± SEM pooled from 3 independent experiments, each dot is a separate mouse, p values <0.05 indicated, Kruskal-Wallis ANOVA with Dunn's correction for multiple comparisons.

### A *Chat<sup>Cre</sup>tdTomato*

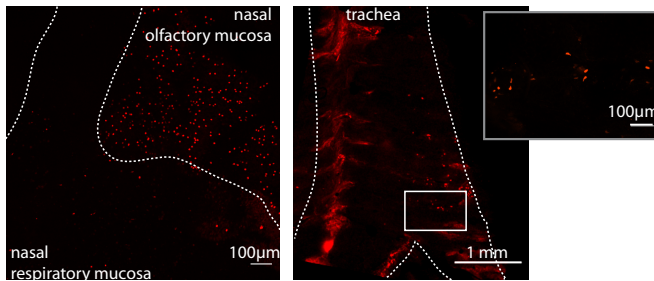

### B *Chat<sup>Cre</sup>tdTomato*

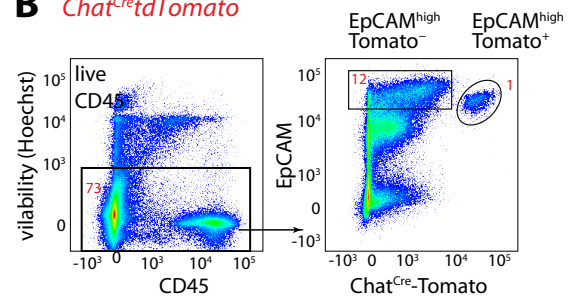

### D *Ltc4s<sup>fl/fl</sup>*

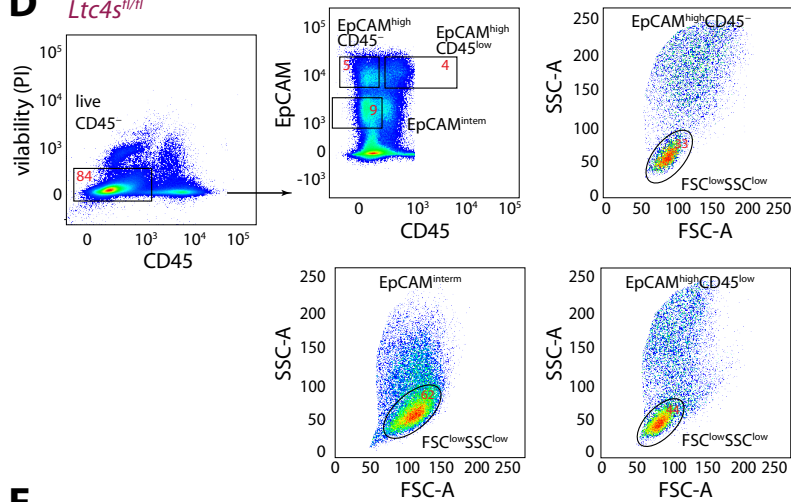

### C Tuft (EpCAM<sup>high</sup>Tomato<sup>+</sup>)

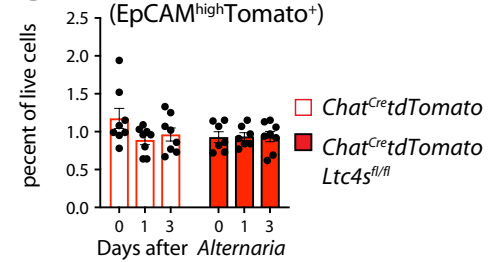

### E Tuft (EpCAM<sup>high</sup>CD45<sup>low</sup>) and Nasal Immune (CD45<sup>+</sup>)

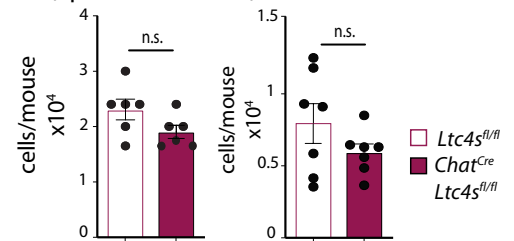

### F

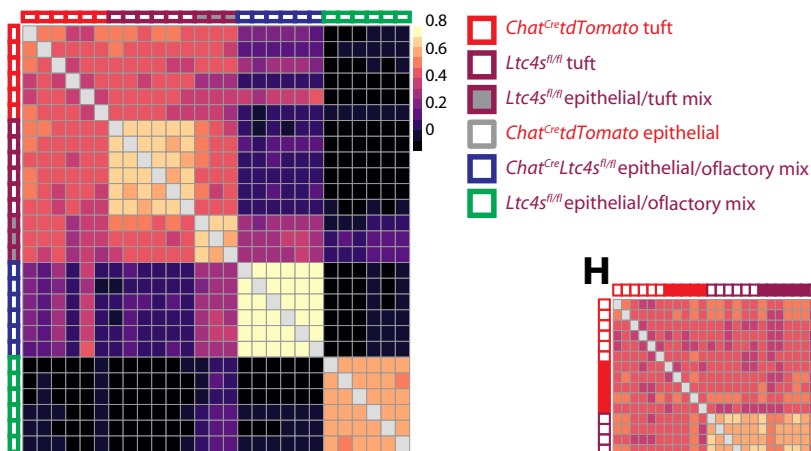

### G

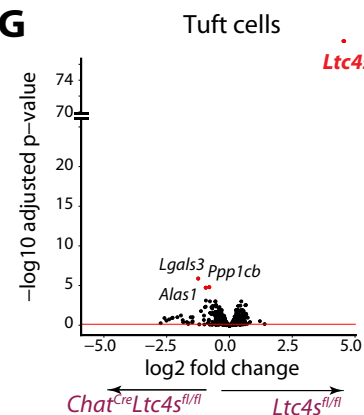

### H

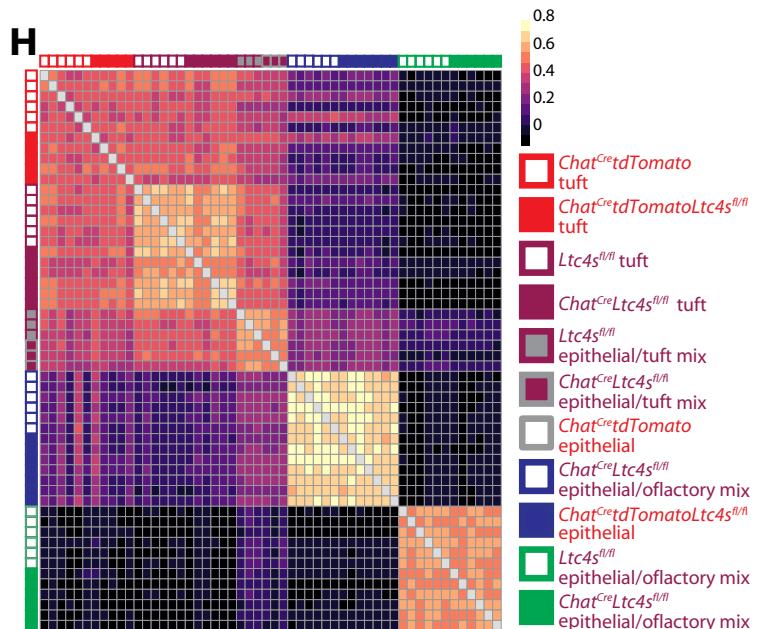



**Fig. S4. EpCAM<sup>high</sup> CD45<sup>low</sup> cells are highly enriched for tuft cells.** (A) Whole mount of nose with olfactory and respiratory portion (left) and whole mount of trachea (right) from a *Chat<sup>Cre</sup>tdTomato* mouse. (B) Gating strategy for isolation of tuft cells and epithelial cells from the nasal mucosa of *Chat<sup>Cre</sup>tdTomato* mice. (C) Comparison of the numbers and frequency of tuft cells from control *Chat<sup>Cre</sup>tdTomato* mice to mice with conditional deletion of *Ltc4s* (*Chat<sup>Cre</sup>tdTomatoLTC4s<sup>fl/fl</sup>*). (D) Gating strategy for isolation of tuft cells from the nasal mucosa of *Ltc4s<sup>fl/fl</sup>* mice. Three populations of EpCAM<sup>+</sup> cells were distinguished – EpCAM<sup>high</sup>CD45<sup>+</sup>, EpCAM<sup>high</sup>CD45<sup>-</sup> and EpCAM<sup>interm.</sup>. (E) Comparison of the numbers and frequency of tuft cells and CD45<sup>+</sup> cells from *Ltc4s<sup>fl/fl</sup>* and *Chat<sup>Cre</sup>Ltc4s<sup>fl/fl</sup>* mice. (F) Heatmap demonstrating Pearson's correlation coefficient across expression levels of all highly variable genes (Methods) between all pairs of samples from nasal epithelial groups from *Chat<sup>Cre</sup>tdTomato* and *Ltc4s<sup>fl/fl</sup>* mice, samples are ordered by cluster assignment (color legend). (G) Volcano plot displaying significance (y axis, -log<sub>10</sub>(FDR)) of differential expression (x axis, log<sub>2</sub> fold-change) in EpCAM<sup>high</sup>CD45<sup>low</sup> tuft cell-enriched cells between *Ltc4s<sup>fl/fl</sup>* and *Chat<sup>Cre</sup>Ltc4s<sup>fl/fl</sup>* mice. Note split Y axis to highlight genes with low level of fold change and significance. (H) Heatmap demonstrating Pearson's correlation coefficient across tuft cells and epithelial cells from mice with and without conditional deletion of *Ltc4s*.

### A MOUSE BRAIN AND SENSORY NEURONS

Chat Ltc4s Both

| Chat | Ltc4s | Both | Cell Type                                                  |
|------|-------|------|------------------------------------------------------------|
| 0.00 | 0.45  | 0.00 | Cycling microglia                                          |
| 0.00 | 0.31  | 0.00 | Early macrophage                                           |
| 0.00 | 0.65  | 0.00 | Non-cycling perivascular macrophages                       |
| 0.00 | 0.58  | 0.00 | Non-cycling microglia                                      |
| 0.00 | 0.58  | 0.00 | Immune - undefined                                         |
| 0.00 | 0.52  | 0.00 | Axon tract-associated microglia                            |
| 0.00 | 0.54  | 0.00 | Cycling perivascular macrophages                           |
| 0.33 | 0.00  | 0.00 | Motor neuron                                               |
| 0.11 | 0.00  | 0.00 | Motor neuron                                               |
| 0.00 | 0.06  | 0.00 | Choroid plexus                                             |
| 0.00 | 0.04  | 0.00 | Endothelial                                                |
| 0.00 | 0.04  | 0.00 | Platelet                                                   |
| 0.00 | 0.04  | 0.00 | Extraembryonic ectoderm                                    |
| 0.00 | 0.04  | 0.00 | Angioblast                                                 |
| 0.02 | 0.00  | 0.00 | Epithalamus glutamatergic                                  |
| 0.01 | 0.00  | 0.00 | Neuron/Undefined                                           |
| 0.01 | 0.00  | 0.00 | Zona limitans intrathalamica                               |
| 0.01 | 0.00  | 0.00 | Neuroblast/Sensory neuron                                  |
| 0.01 | 0.00  | 0.00 | Neuron/Mixed region and neurotransmitter                   |
| 0.00 | 0.01  | 0.00 | Ectoderm/Dorsal early ectoderm                             |
| 0.00 | 0.01  | 0.00 | Immune/Infiltrating immune                                 |
| 0.00 | 0.01  | 0.00 | Gastrulation/Hematopoietical lineage                       |
| 0.00 | 0.00  | 0.00 | Vasculature/Undefined                                      |
| 0.00 | 0.00  | 0.00 | Fibroblast/Intermediate meninges 2                         |
| 0.00 | 0.01  | 0.00 | Ectoderm/Early ectoderm                                    |
| 0.00 | 0.00  | 0.00 | Gastrulation/Endoderm                                      |
| 0.00 | 0.00  | 0.00 | Ectoderm/Surface ectoderm                                  |
| 0.00 | 0.00  | 0.00 | Radial glial/Hindbrain floor plate                         |
| 0.00 | 0.00  | 0.00 | Ectoderm/Pharyngeal epithelium                             |
| 0.00 | 0.00  | 0.00 | Fibroblast/Arachnoid                                       |
| 0.00 | 0.00  | 0.00 | Ependymal/Forebrain                                        |
| 0.00 | 0.00  | 0.00 | Fibroblast/Dura                                            |
| 0.00 | 0.01  | 0.00 | Ectoderm/Adenohypophyseal placode                          |
| 0.00 | 0.01  | 0.00 | Mesoderm/Cardiac                                           |
| 0.00 | 0.00  | 0.00 | Vasculature/Vascular smooth muscle                         |
| 0.00 | 0.00  | 0.00 | Vasculature/Pericyte                                       |
| 0.00 | 0.00  | 0.00 | Neuroectodermal organ/Subcommissural organ hypendymal cell |
| 0.00 | 0.00  | 0.00 | Schwann cell/Schwann cell                                  |
| 0.00 | 0.00  | 0.00 | Radial glial/Ventral midbrain                              |
| 0.00 | 0.00  | 0.00 | Radial glial/Ventral hindbrain                             |
| 0.00 | 0.00  | 0.00 | Radial glial/Undefined                                     |
| 0.00 | 0.00  | 0.00 | Radial glial/Spinal cord                                   |
| 0.00 | 0.00  | 0.00 | Radial glial/Roof plate                                    |
| 0.00 | 0.00  | 0.00 | Radial glial/Mixed region                                  |
| 0.00 | 0.00  | 0.00 | Radial glial/Midbrain floor plate                          |
| 0.00 | 0.00  | 0.00 | Radial glial/Midbrain basal plate                          |
| 0.00 | 0.00  | 0.00 | Radial glial/Midbrain                                      |
| 0.00 | 0.00  | 0.00 | Radial glial/Late isthmic organizer                        |
| 0.00 | 0.00  | 0.00 | Radial glial/Hypothalamus                                  |
| 0.00 | 0.00  | 0.00 | Radial glial/Hypothalamic floor-plate like                 |
| 0.00 | 0.00  | 0.00 | Radial glial/Hindbrain                                     |
| 0.00 | 0.00  | 0.00 | Radial glial/Fourth-ventricle roof plate                   |
| 0.00 | 0.00  | 0.00 | Radial glial/Ependymal-like                                |
| 0.00 | 0.00  | 0.00 | Radial glial/Early choroid plexus                          |
| 0.00 | 0.00  | 0.00 | Radial glial/Dorsal midbrain                               |
| 0.00 | 0.00  | 0.00 | Radial glial/Dorsal hindbrain and spinal cord              |
| 0.00 | 0.00  | 0.00 | Radial glial/Dorsal hindbrain                              |
| 0.00 | 0.00  | 0.00 | Radial glial/Diencephalon                                  |
| 0.00 | 0.00  | 0.00 | Radial glial/Diencephalon                                  |
| 0.00 | 0.00  | 0.00 | Radial glial/Diencephalic roof plate                       |
| 0.00 | 0.00  | 0.00 | Radial glial/Anteromedial cerebral pole                    |
| 0.00 | 0.00  | 0.00 | Pineal gland/Pineal gland                                  |
| 0.00 | 0.00  | 0.00 | Oligodendrocyte/Undefined                                  |
| 0.00 | 0.00  | 0.00 | Oligodendrocyte/Oligodendrocyte                            |
| 0.00 | 0.00  | 0.00 | Oligodendrocyte/Committed oligodendrocyte precursor        |
| 0.00 | 0.00  | 0.00 | Olfactory ensheathing cell/Olfactory ensheathing cell      |
| 0.00 | 0.00  | 0.00 | Neuron/Spinal cord glycinergic                             |
| 0.00 | 0.00  | 0.00 | Neuron/Posterior hindbrain glutamatergic                   |
| 0.00 | 0.00  | 0.00 | Neuron/Plutary neuroendocrine                              |
| 0.00 | 0.00  | 0.00 | Neuron/Mixed region                                        |
| 0.00 | 0.00  | 0.00 | Neuron/Midbrain-hindbrain GABAergic                        |
| 0.00 | 0.00  | 0.00 | Neuron/Midbrain dopaminergic                               |
| 0.00 | 0.00  | 0.00 | Neuron/Hypothalamus glutamatergic                          |
| 0.00 | 0.00  | 0.00 | Neuroblast/Undefined                                       |
| 0.00 | 0.00  | 0.00 | Neuroblast/Thalamus glutamatergic                          |
| 0.00 | 0.00  | 0.00 | Neuroblast/Spinal cord glutamatergic                       |
| 0.00 | 0.00  | 0.00 | Neuroblast/Cajal-Retzius                                   |
| 0.00 | 0.00  | 0.00 | Neural tubel/Undefined                                     |
| 0.00 | 0.00  | 0.00 | Neural tubel/Optic cup                                     |
| 0.00 | 0.00  | 0.00 | Neural tubel/Neuroesodermal progenitors                    |
| 0.00 | 0.00  | 0.00 | Neural tubel/Floor plate                                   |
| 0.00 | 0.00  | 0.00 | Neural tubel/Caudal                                        |
| 0.00 | 0.00  | 0.00 | Mesoderm/Pharyngeal                                        |
| 0.00 | 0.00  | 0.00 | Mesenchyme/Mesenchyme                                      |
| 0.00 | 0.00  | 0.00 | Glioblast/Undefined                                        |
| 0.00 | 0.00  | 0.00 | Glioblast/Spinal cord                                      |
| 0.00 | 0.00  | 0.00 | Glioblast/Mixed region                                     |
| 0.00 | 0.00  | 0.00 | Glioblast/Midbrain                                         |
| 0.00 | 0.00  | 0.00 | Glioblast/Forebrain astrocyte                              |
| 0.00 | 0.00  | 0.00 | Glioblast/Forebrain                                        |
| 0.00 | 0.00  | 0.00 | Gastrulation/Visceral endoderm                             |
| 0.00 | 0.00  | 0.00 | Gastrulation/Primordial germ cells                         |
| 0.00 | 0.00  | 0.00 | Gastrulation/Parietal endoderm                             |
| 0.00 | 0.00  | 0.00 | Gastrulation/Node                                          |
| 0.00 | 0.00  | 0.00 | Gastrulation/Mesoderm                                      |
| 0.00 | 0.00  | 0.00 | Gastrulation/Mesenchyme                                    |
| 0.00 | 0.00  | 0.00 | Gastrulation/Calcial mesoderm                              |
| 0.00 | 0.00  | 0.00 | Fibroblast/Undefined                                       |
| 0.00 | 0.00  | 0.00 | Fibroblast/Plia 3                                          |
| 0.00 | 0.00  | 0.00 | Fibroblast/Plia 1                                          |
| 0.00 | 0.00  | 0.00 | Fibroblast/Perivascular fibroblast-like cells              |
| 0.00 | 0.00  | 0.00 | Fibroblast/Intermediate meninges 1                         |
| 0.00 | 0.00  | 0.00 | Fibroblast/Early fibroblasts                               |
| 0.00 | 0.00  | 0.00 | Fibroblast/Chondrocytes                                    |
| 0.00 | 0.00  | 0.00 | Fibroblast/Arachnoid barrier cells                         |
| 0.00 | 0.00  | 0.00 | Ependymal/Undefined                                        |
| 0.00 | 0.00  | 0.00 | Ependymal/Mixed region                                     |
| 0.00 | 0.00  | 0.00 | Ectoderm/Otic vesicle                                      |
| 0.00 | 0.00  | 0.00 | Ectoderm/Oral ectoderm                                     |
| 0.00 | 0.00  | 0.00 | Ectoderm/Olfactory epithelium                              |
| 0.00 | 0.00  | 0.00 | Ectoderm/Lens                                              |
| 0.00 | 0.00  | 0.00 | Blood/Erythrocyte                                          |
| 0.00 | 0.00  | 0.00 | Ectoderm/Lateral nasal pit                                 |
| 0.00 | 0.00  | 0.00 | Bad cells/Undefined                                        |
| 0.00 | 0.00  | 0.00 | Neuroblast/Forebrain GABAergic                             |
| 0.00 | 0.00  | 0.00 | Glioblast/Hindbrain                                        |
| 0.00 | 0.00  | 0.00 | Blood/Erythroid progenitor                                 |
| 0.00 | 0.00  | 0.00 | Radial glial/dorsal forebrain                              |
| 0.00 | 0.00  | 0.00 | Neuroblast/Forebrain glutamatergic                         |
| 0.00 | 0.00  | 0.00 | Neuron/Cortical or hippocampal glutamatergic               |
| 0.00 | 0.00  | 0.00 | Neuron/Midbrain GABAergic                                  |
| 0.00 | 0.00  | 0.00 | Radial glial/Forebrain                                     |
| 0.00 | 0.00  | 0.00 | Ectoderm/Undefined                                         |
| 0.00 | 0.00  | 0.00 | Neural crest/Neural crest                                  |
| 0.00 | 0.00  | 0.00 | Neuron/Cerebellum glutamatergic                            |
| 0.00 | 0.00  | 0.00 | Neuroblast/Neuronal intermediate progenitor                |
| 0.00 | 0.00  | 0.00 | Neuron/Midbrain glutamatergic                              |
| 0.00 | 0.00  | 0.00 | Neuroblast/Hindbrain glycinergic                           |
| 0.00 | 0.00  | 0.00 | Neuron/Cajal-Retzius                                       |
| 0.00 | 0.00  | 0.00 | Blood/Undefined                                            |
| 0.00 | 0.00  | 0.00 | Neuron/Diencephalon glutamatergic                          |
| 0.00 | 0.00  | 0.00 | Ectoderm/Olfactory pit                                     |
| 0.00 | 0.00  | 0.00 | Gastrulation/Epiblast                                      |
| 0.00 | 0.00  | 0.00 | Endoderm/Int                                               |
| 0.00 | 0.00  | 0.00 | Radial glial/Cortical hem                                  |
| 0.00 | 0.00  | 0.00 | Oligodendrocyte/Oligodendrocyte precursor cell             |
| 0.00 | 0.00  | 0.00 | Fibroblast/Plia 2                                          |
| 0.00 | 0.00  | 0.00 | Radial glial/Hindbrain roof plate                          |
| 0.00 | 0.00  | 0.00 | Radial glial/Hindbrain-hindbrain boundary                  |
| 0.00 | 0.00  | 0.00 | Gastrulation/Definitive endoderm                           |
| 0.00 | 0.00  | 0.00 | Gastrulation/Extraembryonic endoderm                       |
| 0.00 | 0.00  | 0.00 | Glioblast/Mixed region astrocytes                          |
| 0.00 | 0.00  | 0.00 | Radial glial/Bergmann glia                                 |
| 0.00 | 0.00  | 0.00 | Gastrulation/Undefined                                     |
| 0.00 | 0.00  | 0.00 | Glioblast/PreOPC                                           |
| 0.00 | 0.00  | 0.00 | Neuron/Cerebellum GABAergic                                |
| 0.00 | 0.00  | 0.00 | Neuroblast/Mixed region glutamatergic                      |
| 0.00 | 0.00  | 0.00 | Gastrulation/Osteochondral mesoderm                        |
| 0.01 | 0.00  | 0.00 | Neuron/Hindbrain glutamatergic                             |
| 0.01 | 0.00  | 0.00 | Undefined/Sensory neuron                                   |
| 0.01 | 0.00  | 0.00 | Neural tubel/Anterior                                      |
| 0.01 | 0.00  | 0.00 | Gastrulation/Anterior primitive streak                     |
| 0.01 | 0.00  | 0.00 | Neuron/Dorsal midbrain glutamatergic                       |
| 0.00 | 0.00  | 0.00 | Neuron/Forebrain GABAergic                                 |
| 0.00 | 0.00  | 0.00 | Neuroblast/Hindbrain                                       |
| 0.00 | 0.00  | 0.00 | Neuroblast/Hindbrain                                       |
| 0.00 | 0.00  | 0.00 | Neuroblast/Hindbrain glutamatergic                         |
| 0.00 | 0.00  | 0.00 | Neuron/Spinal cord glutamatergic                           |
| 0.00 | 0.00  | 0.00 | Neuroblast/Midbrain GABAergic                              |
| 0.00 | 0.00  | 0.00 | Neuroblast/Midbrain glutamatergic                          |
| 0.00 | 0.00  | 0.00 | Neuroblast/Hindbrain GABAergic                             |
| 0.00 | 0.00  | 0.00 | Neuroblast/Midbrain                                        |
| 0.00 | 0.00  | 0.00 | Mesoderm/Paraxial                                          |
| 0.00 | 0.00  | 0.00 | Neuroblast/Mixed region                                    |
| 0.00 | 0.00  | 0.00 | Neuron/Forebrain glutamatergic                             |
| 0.00 | 0.00  | 0.00 | Neuron/Hypothalamus                                        |
| 0.00 | 0.00  | 0.00 | Neuron/Mixed region glutamatergic                          |
| 0.00 | 0.00  | 0.00 | Neuron/Mixed region GABAergic                              |
| 0.00 | 0.00  | 0.00 | Neuron/Hindbrain GABAergic                                 |
| 0.00 | 0.00  | 0.00 | Neuroblast/Forebrain                                       |
| 0.00 | 0.00  | 0.00 | Neuron/Sensory neuron                                      |
| 0.00 | 0.00  | 0.00 | Mesenchyme/Undefined                                       |
| 0.00 | 0.00  | 0.00 | Neuron/Hindbrain serotonergic                              |
| 0.00 | 0.00  | 0.00 | Gastrulation/Nascent mesoderm                              |
| 0.00 | 0.00  | 0.00 | Neuron/Hindbrain glycinergic                               |

Fraction expressing

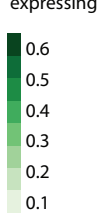

### B NASAL MUCOSA

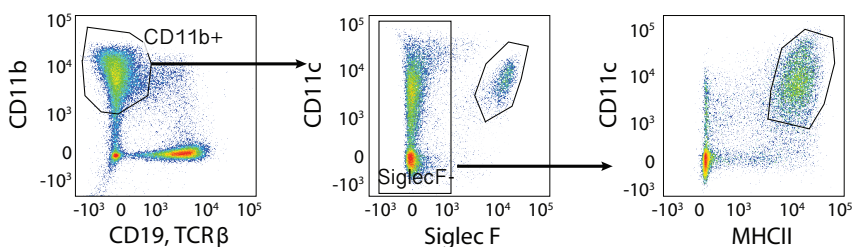

### C

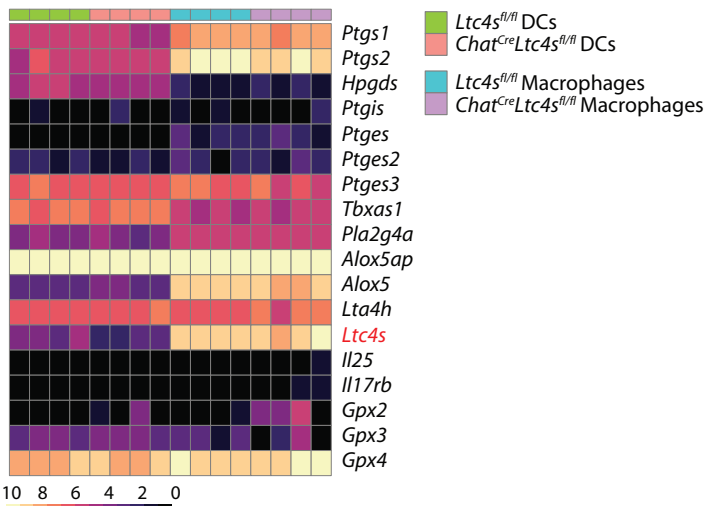

### D

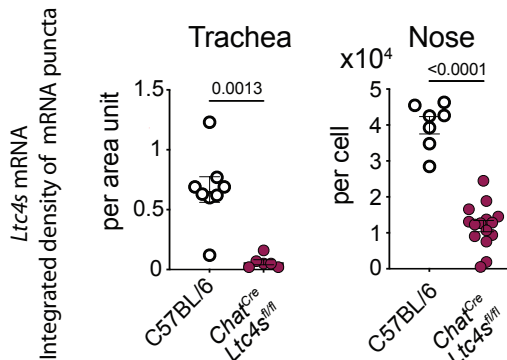

### E NASAL ASSOCIATED LYMPHOID TISSUE

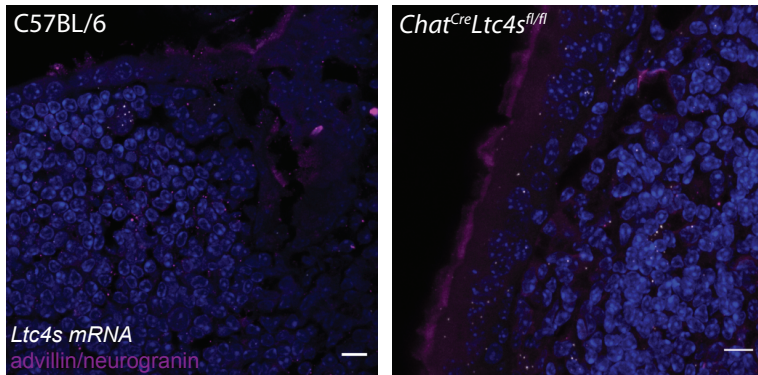

**Fig. S5. *Chat* and *Ltc4s* are not co-expressed in neurons or immune cells.** (A) Fraction of cells expressing *Chat* (first column), *Ltc4s* (second column) and both transcripts (third column) in central and peripheral neurons and nervous system immune cells from previously published data downloaded from the Mouse Brain Atlas (46). (B) DCs and macrophages were defined within the CD45<sup>+</sup> cell subset as CD19<sup>-</sup> (B cell marker), TCRβ<sup>-</sup> (T cell marker), CD11b<sup>+</sup>, and SiglecF<sup>+</sup> for macrophages. DCs were further defined as SiglecF<sup>-</sup> CD11c<sup>+</sup> and MHCII<sup>+</sup>. (C) Heatmap shows expression (log<sub>2</sub>(TPM+1), color bar) of genes in the 5-lipoxygenase and cyclooxygenase pathways in DCs and macrophages derived from *Ltc4s*<sup>fl/fl</sup> and *Chat*<sup>Cre</sup>*Ltc4s*<sup>fl/fl</sup> mice. (D) *Ltc4s* mRNA was quantitated as the integrated density of puncta in the epithelium of the trachea (WT: 8, *Chat*<sup>Cre</sup>*Ltc4s*<sup>fl/fl</sup>: 6 images) and nose (WT: 7, *Chat*<sup>Cre</sup>*Ltc4s*<sup>fl/fl</sup>: 15 images). (E) *In situ* hybridization for *Ltc4s* in nasal associated lymphoid tissue (nasal submucosa) of WT and *Chat*<sup>Cre</sup>*Ltc4s*<sup>fl/fl</sup> mice. Scale bar 100 μm.

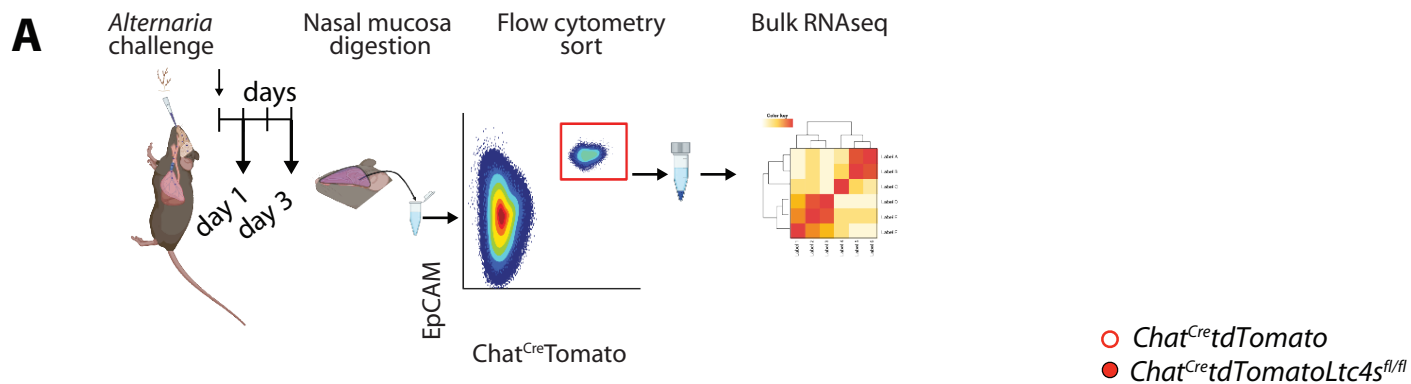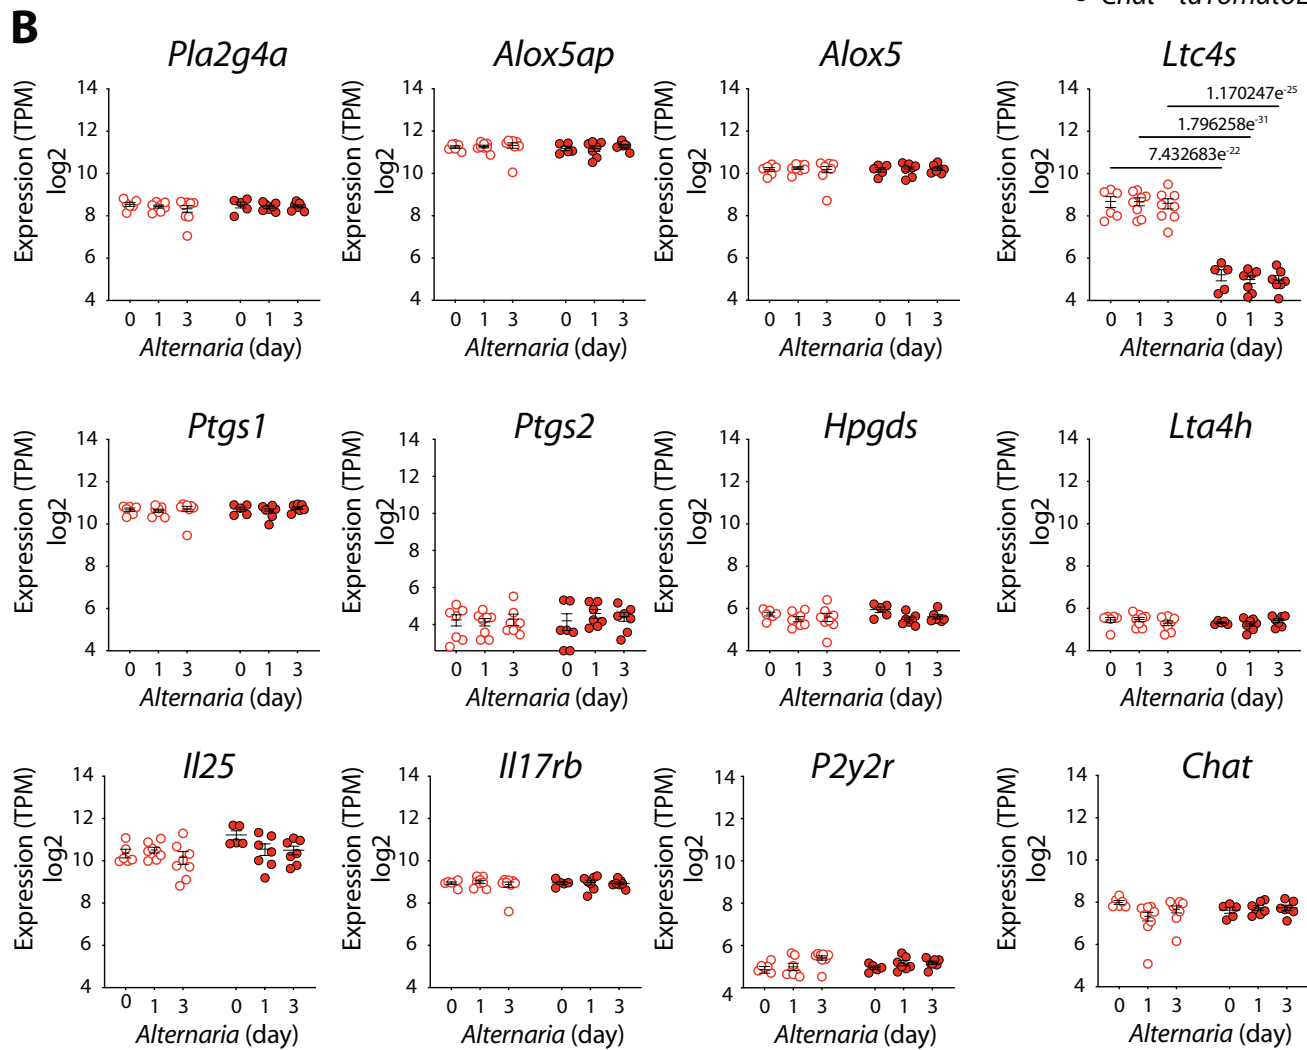

**Fig. S6. The eicosanoid transcriptional profile of tuft cells is unaltered by *Alternaria* challenge.**

(A) *Chat<sup>Cre</sup>tdTomato* and *Chat<sup>Cre</sup>tdTomatoLtc4s<sup>fl/fl</sup>* mice were given a single intranasal inhalation of *Alternaria* allergen and tuft cells were isolated based on their expression of EpCAM and tdTomato 39 hours or 72 hours after the challenge. (B) The tuft cell transcriptional profile was evaluated by bulk RNAseq. Expression level in transcripts per million (TPM) of the indicated genes. Data are means  $\pm$  SEM from two independent experiments, each mouse is a separate dot. Normalization and differential expression analysis was performed by DeSeq2.

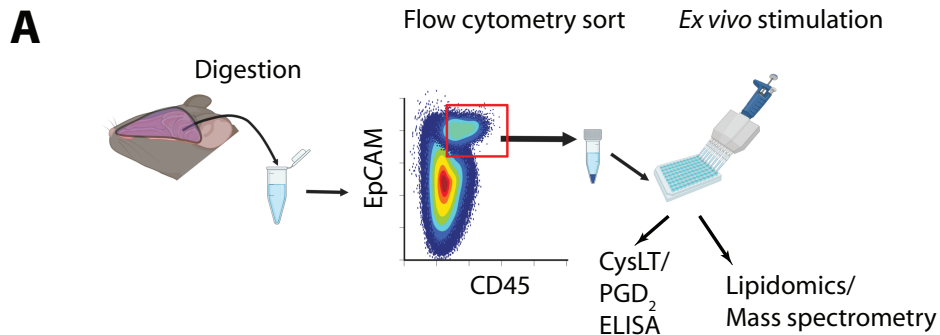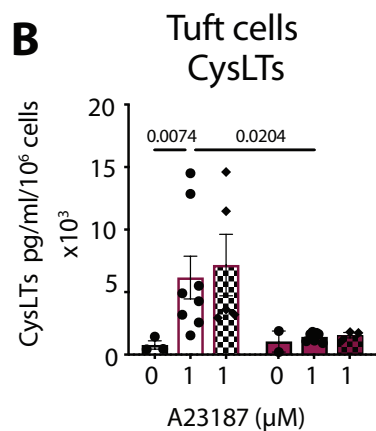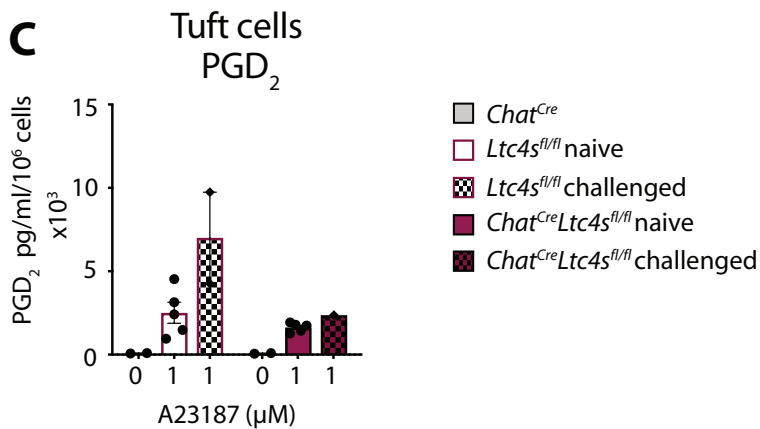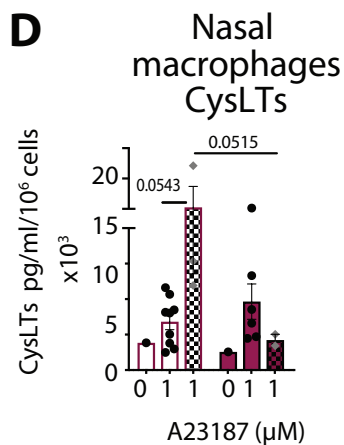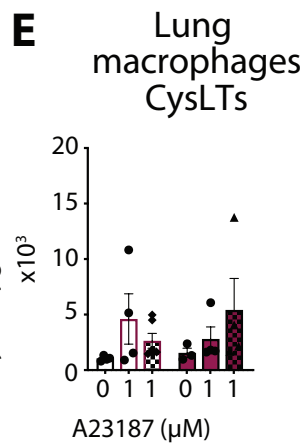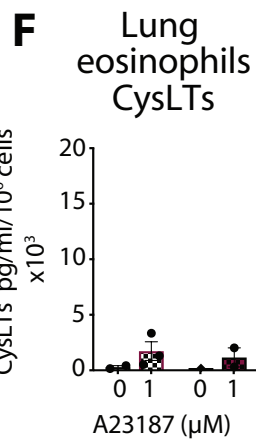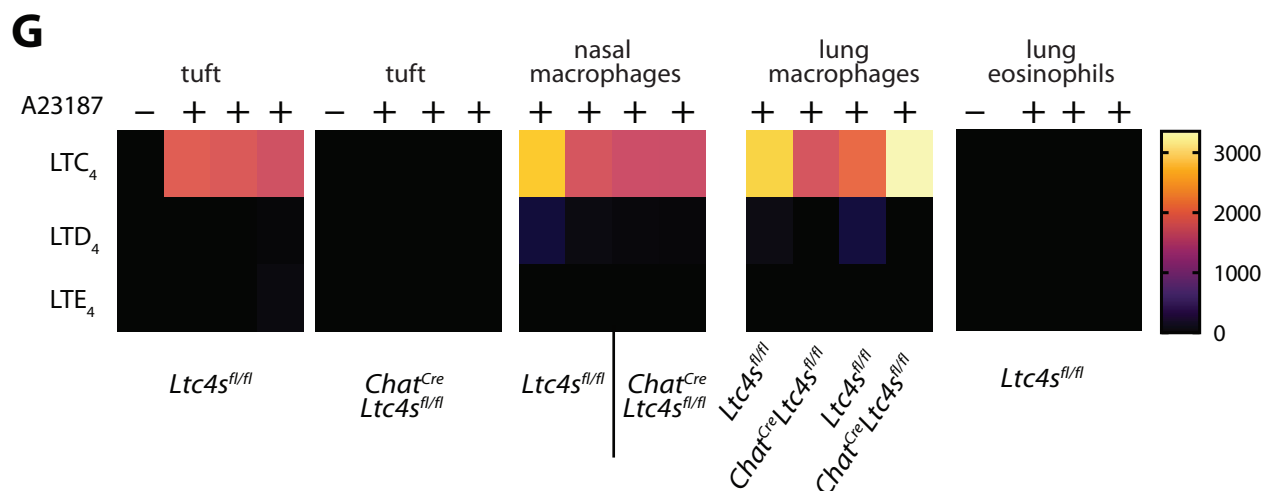

**Fig. S7. *Ltc4s* deletion does not alter the eicosanoid generating capacity of airway immune cells.** (A) Tuft cells were isolated from the nasal mucosa of *Chat<sup>Cre</sup>, Ltc4s<sup>fl/fl</sup>* and *Chat<sup>Cre</sup>Ltc4s<sup>fl/fl</sup>* based on their expression of EpCAM and CD45. The sorted cells were rested overnight and stimulated *ex vivo* with Ca<sup>2+</sup> ionophore (A23187) or ATP $\gamma$ S. The concentration of eicosanoids in the supernatants was measured by ELISA or lipidomics/LC-MS. Mice were evaluated both in the naïve state and 36 hours after *Alternaria* challenge (B) CysLTs in the supernatant of tuft cells stimulated with Ca<sup>2+</sup> ionophore A23187 measured by ELISA. (C) PGD<sub>2</sub> in the supernatant of tuft cells stimulated with Ca<sup>2+</sup> ionophore A23187 measured by ELISA. (D-F) CysLTs in the supernatants of nasal macrophages (D), lung macrophages (E) and lung eosinophils (F) stimulated with A23187, measured by ELISA. (G) Heatmap of expression (pg/ml of sample) of CysLTs assessed by liquid chromatography/mass spectrometry. Tuft cells, nasal and lung macrophages and eosinophils were sorted from naïve and *Alternaria* challenged mice (eosinophils). Cells were stimulated with HBSS or A23187 and the supernatants were assessed after 30 min. Data is expressed as pg/ml.

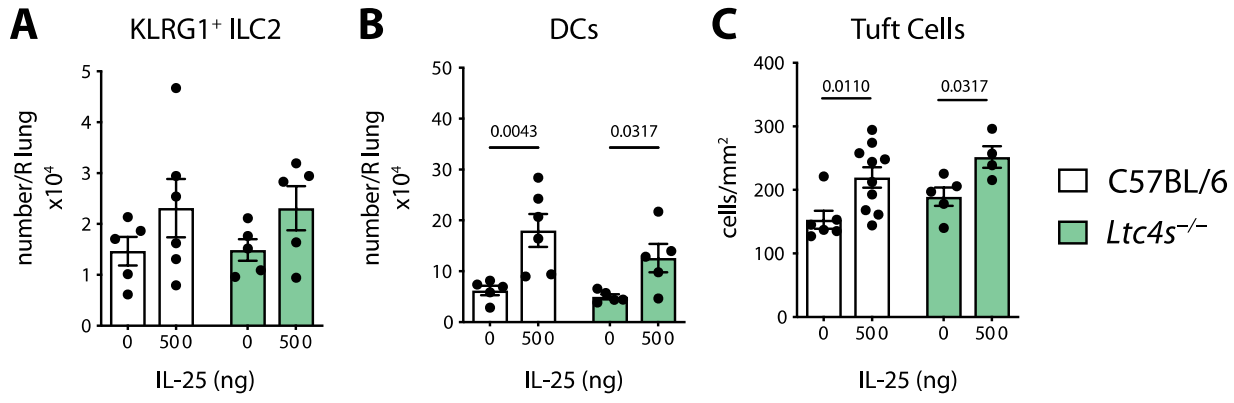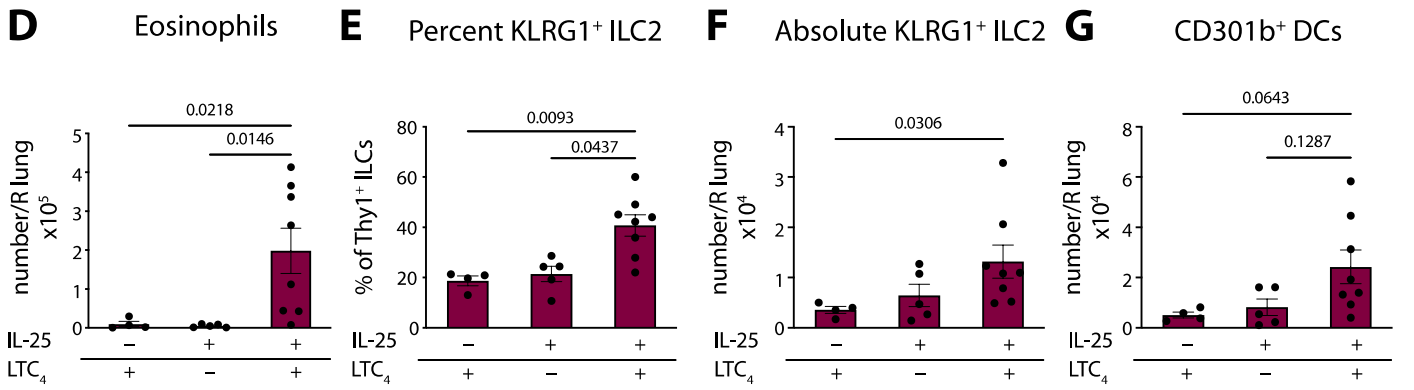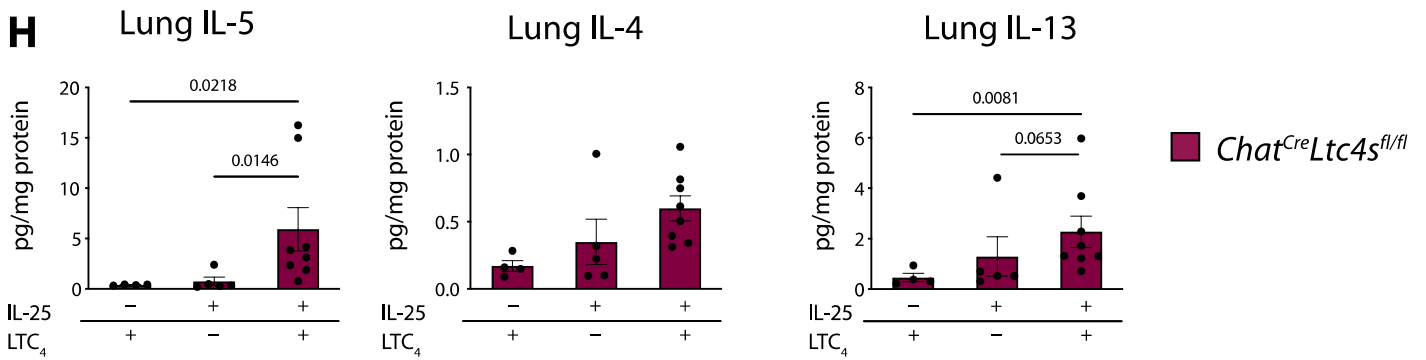



**Fig. S8. *Ltc4s* deletion does not alter the airway responses to IL-25.** (A) WT and *Ltc4s*<sup>-/-</sup> mice were given 3 daily intranasal doses of 500 ng of IL-25 and assessed 2 days after the last dose (**Fig. 1A** schema). (A, B) Lung KLRG1<sup>+</sup> ILC2 numbers (A) and DCs (B) were assessed by FACS. (C) DCLK1<sup>+</sup> tuft cells were enumerated in the trachea. (D-G) *Chat*<sup>Cre</sup>*Ltc4s*<sup>fl/fl</sup> mice were given LTC<sub>4</sub> (1.6 nmol) or IL-25 (100 ng) or a combination of LTC<sub>4</sub> and IL-25 and assessed 2 days after the last dose (**Fig. 1A** schema). (D) The number of eosinophils, (E, F) frequency and number of KLRG1<sup>+</sup>ICOS<sup>+</sup>Thy1.2<sup>+</sup> ILC2s and (G) number of CD301b<sup>+</sup> DCs in the lung were assessed by FACS. (H) Lung cytokine protein concentration was determined by LegendPlex in lung homogenates. Data are means ± SEM pooled from 2 or 3 independent experiments, each dot is a separate mouse, p values <0.05 indicated, Kruskal-Wallis ANOVA with Dunn's correction for multiple comparisons.

## A Bronchoalveolar lavage

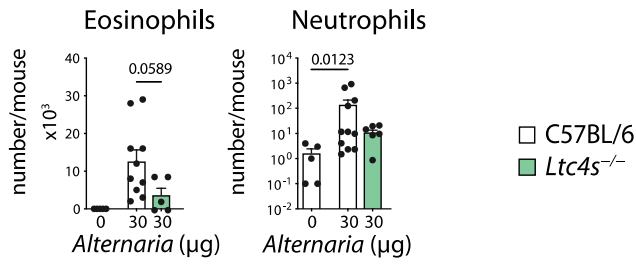

## B Mediastinal lymph node

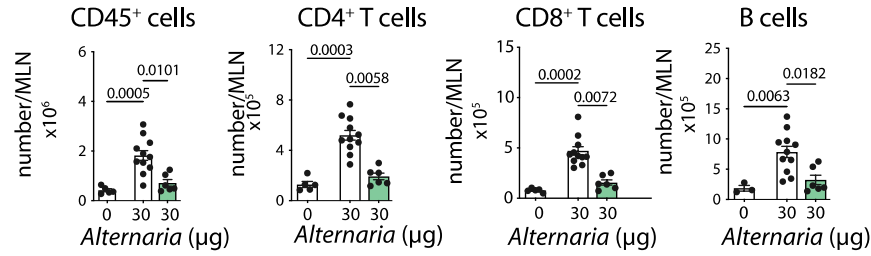

## C Mediastinal lymph node

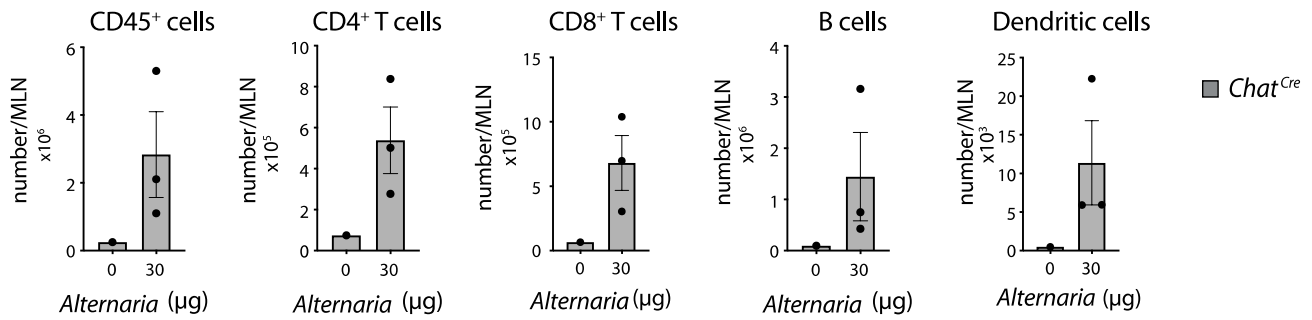

## D LUNG

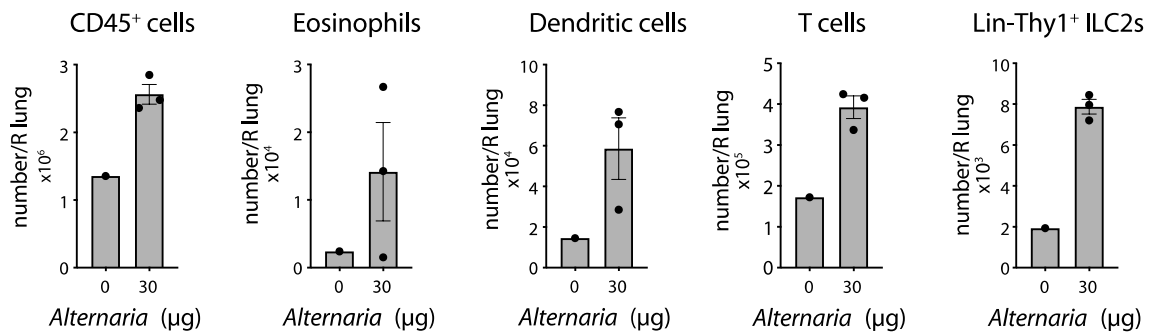

**Fig. S9. Lung and lymph node responses to *Alternaria* in *Ltc4s*<sup>-/-</sup> and *Chat*<sup>Cre</sup> mice .**

(A-B) C57BL/6 and *Ltc4s*<sup>-/-</sup> mice were given a single intranasal dose of *Alternaria* and were evaluated 24 hours after the challenge. (A) Bronchoalveolar lavage cells were counted, and eosinophils and neutrophils were evaluated using Diff-Quick stain. (B) Mediastinal lymph node (MLN) numbers of CD45<sup>+</sup> cells, CD4<sup>+</sup> and CD8<sup>+</sup> T cells and B cells were evaluated by FACS. Data are means ± SEM pooled from ≥ 2 independent experiments, each dot is a separate mouse, p values from Mann Whitney t test are indicated. (C-D) *Chat*<sup>Cre</sup> mice were given a single intranasal dose of *Alternaria* and were evaluated 48 hours later. (C) Mediastinal lymph node (MLN) numbers of CD45<sup>+</sup> cells, CD4<sup>+</sup> and CD8<sup>+</sup> T cells and B cells were evaluated by FACS. (D) Lung CD45<sup>+</sup> cells, eosinophils, DCs, T cells and Thy1<sup>+</sup>ILC2s were assessed by FACS.
